# Supplementary material for: New Triterpenes from Maytenus robusta: Structural Elucidation Based on NMR Experimental Data and Theoretical Calculations
Source: Molecules. 2012 Nov 12;17(11):13439–56. doi: 10.3390/molecules171113439 (PMC6268669; doi:10.3390/molecules171113439)

## Supplementary Information

**Figure S1.** Correlation between the BLYP/6-31G\* calculated carbon chemical shifts and the corresponding experimental  $^{13}\text{C}$ -NMR data of **7**.

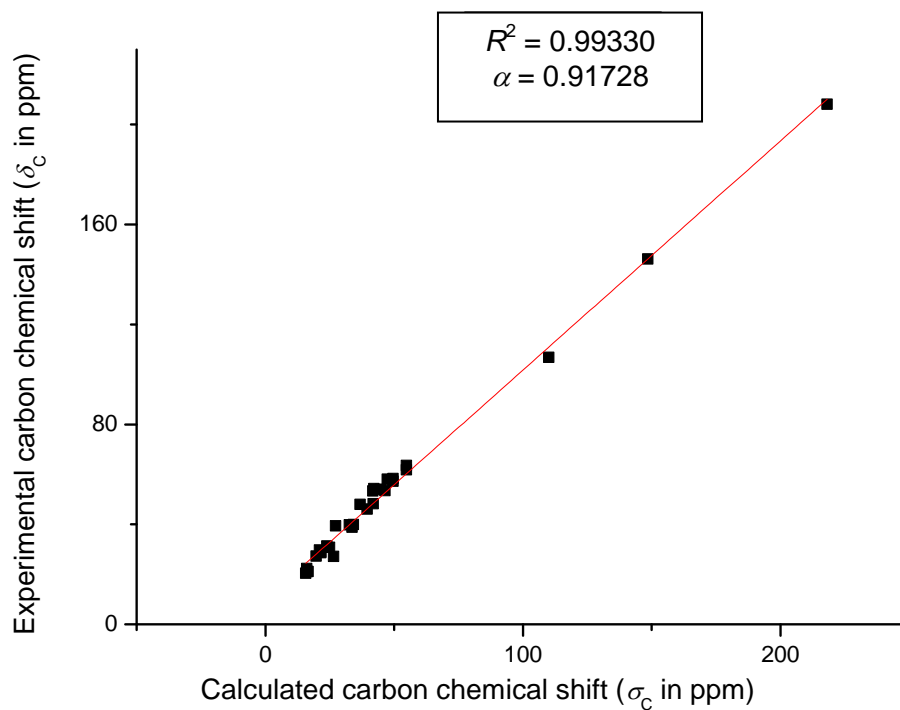

**Figure S2.** Correlation between the BLYP/6-31G\* calculated carbon chemical shifts and the corresponding experimental  $^{13}\text{C}$ -NMR data of **8**.

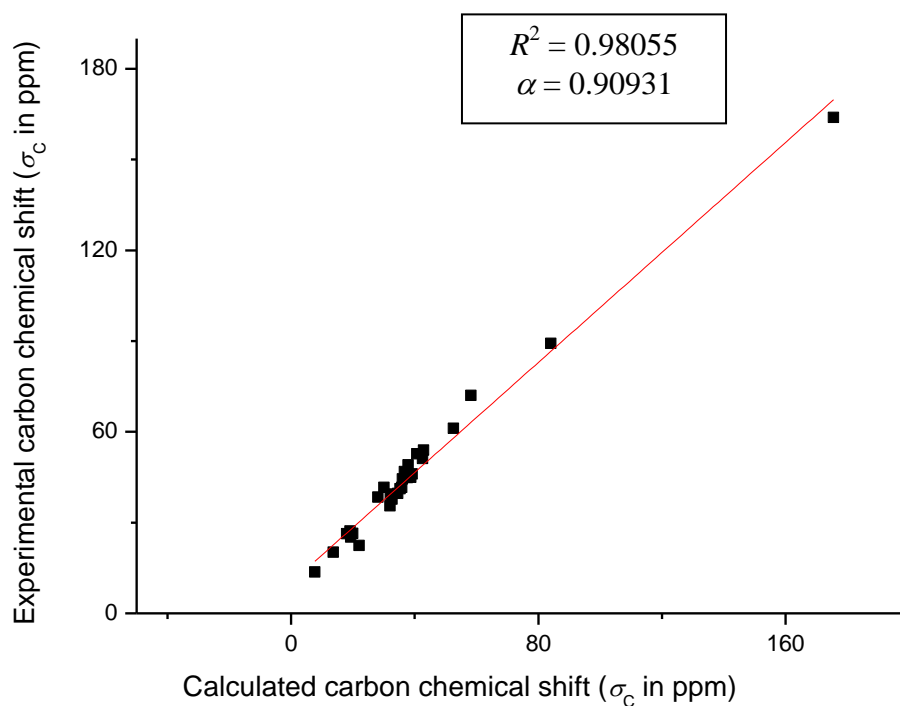

**Figure S3.** Correlation between the BLYP/6-31G \* calculated carbon chemical shifts and the corresponding experimental  $^{13}\text{C}$ -NMR data of **9**.

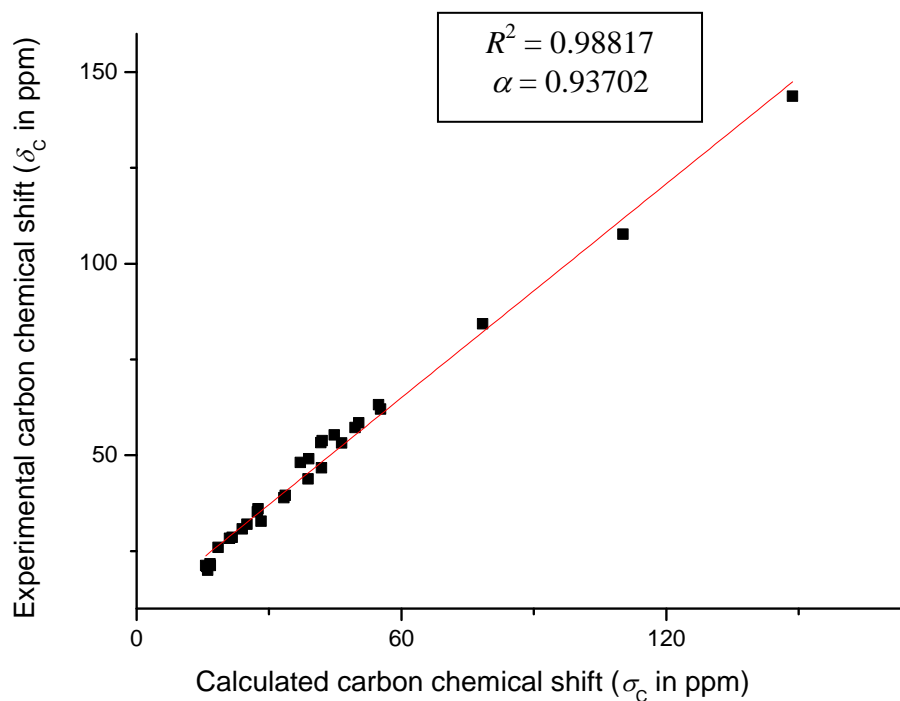

**Figure S4.** Correlation between the BLYP/6-31G\* calculated carbon chemical shifts and the corresponding experimental  $^{13}\text{C}$ -NMR data of **10**.

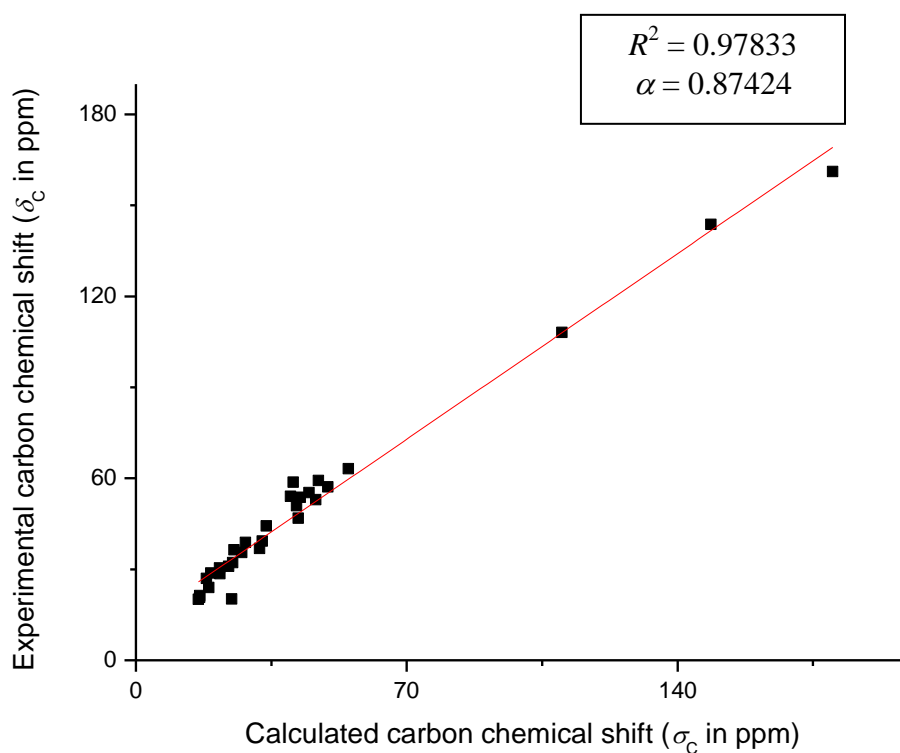

Supplement: Supplementary file 1 [file molecules-17-13439-s001.pdf]
